# Supplementary material for: Genomic patterns and characterizations of chromosomally-encoded mcr-1 in Escherichia coli populations
Source: Springer Nature journal article supplement (doi:10.1186/s13099-020-00393-2), 2020-11-28

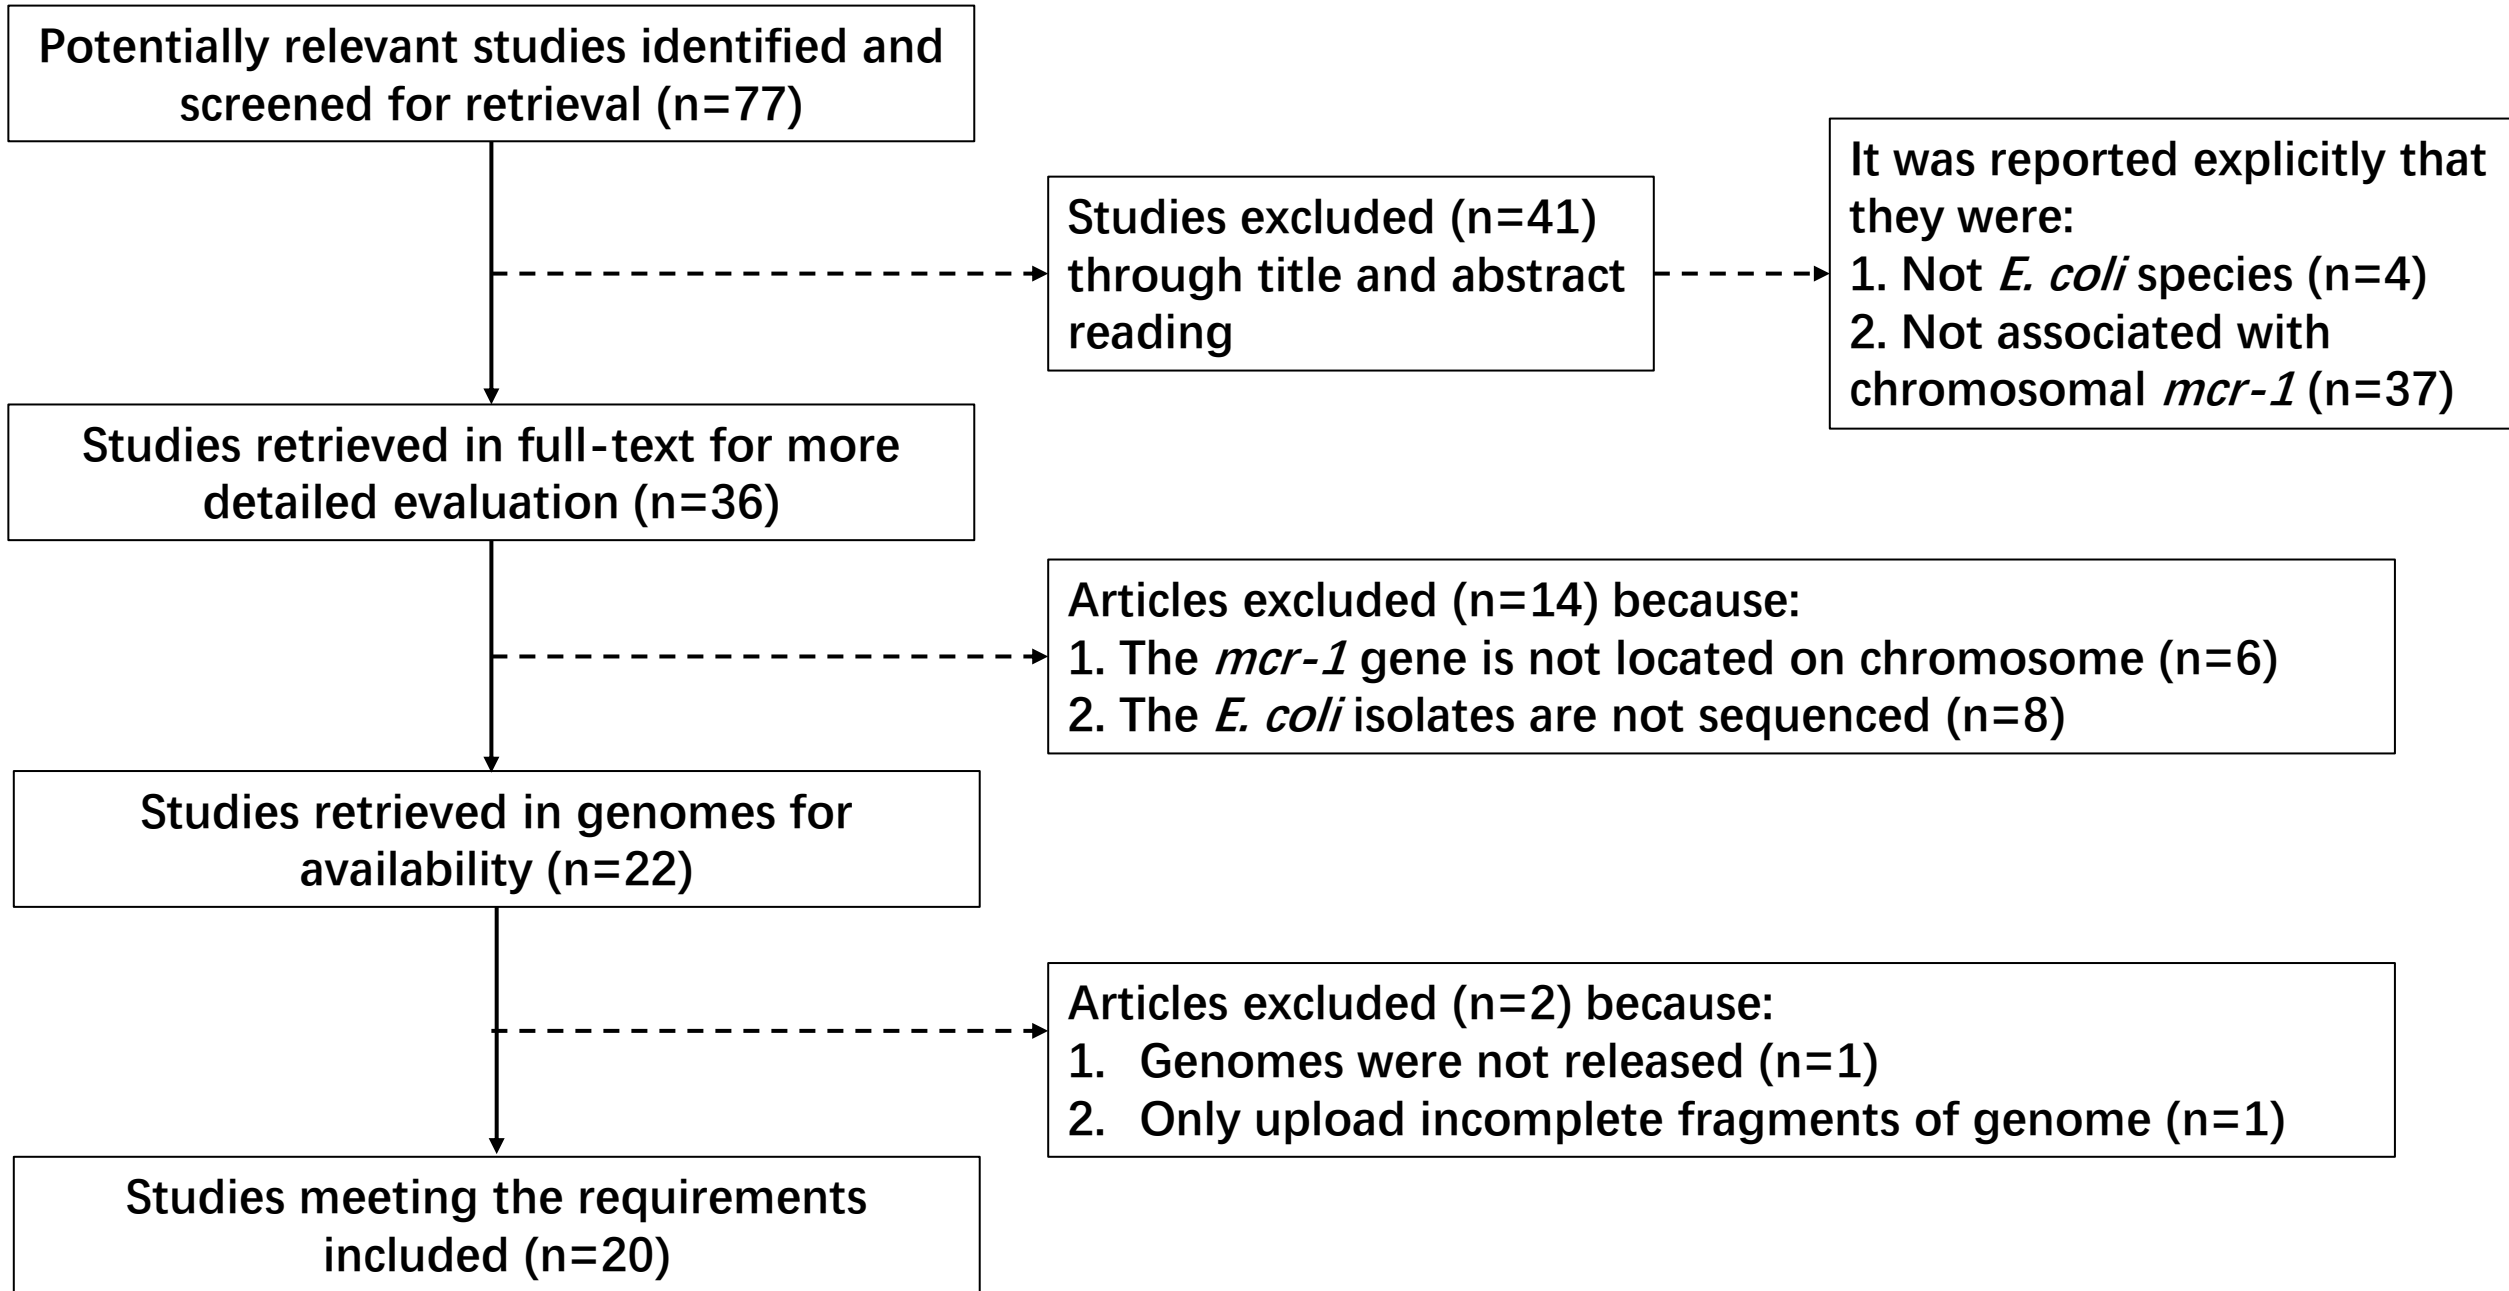

Supplement: MOESM3 [file 18636890]
